# Supplementary material
Source: Springer Nature journal article supplement (https://www.springermedizin.de/resource/supplementary/12889_2011_3986_MOESM4_ESM.pdf/9491278)

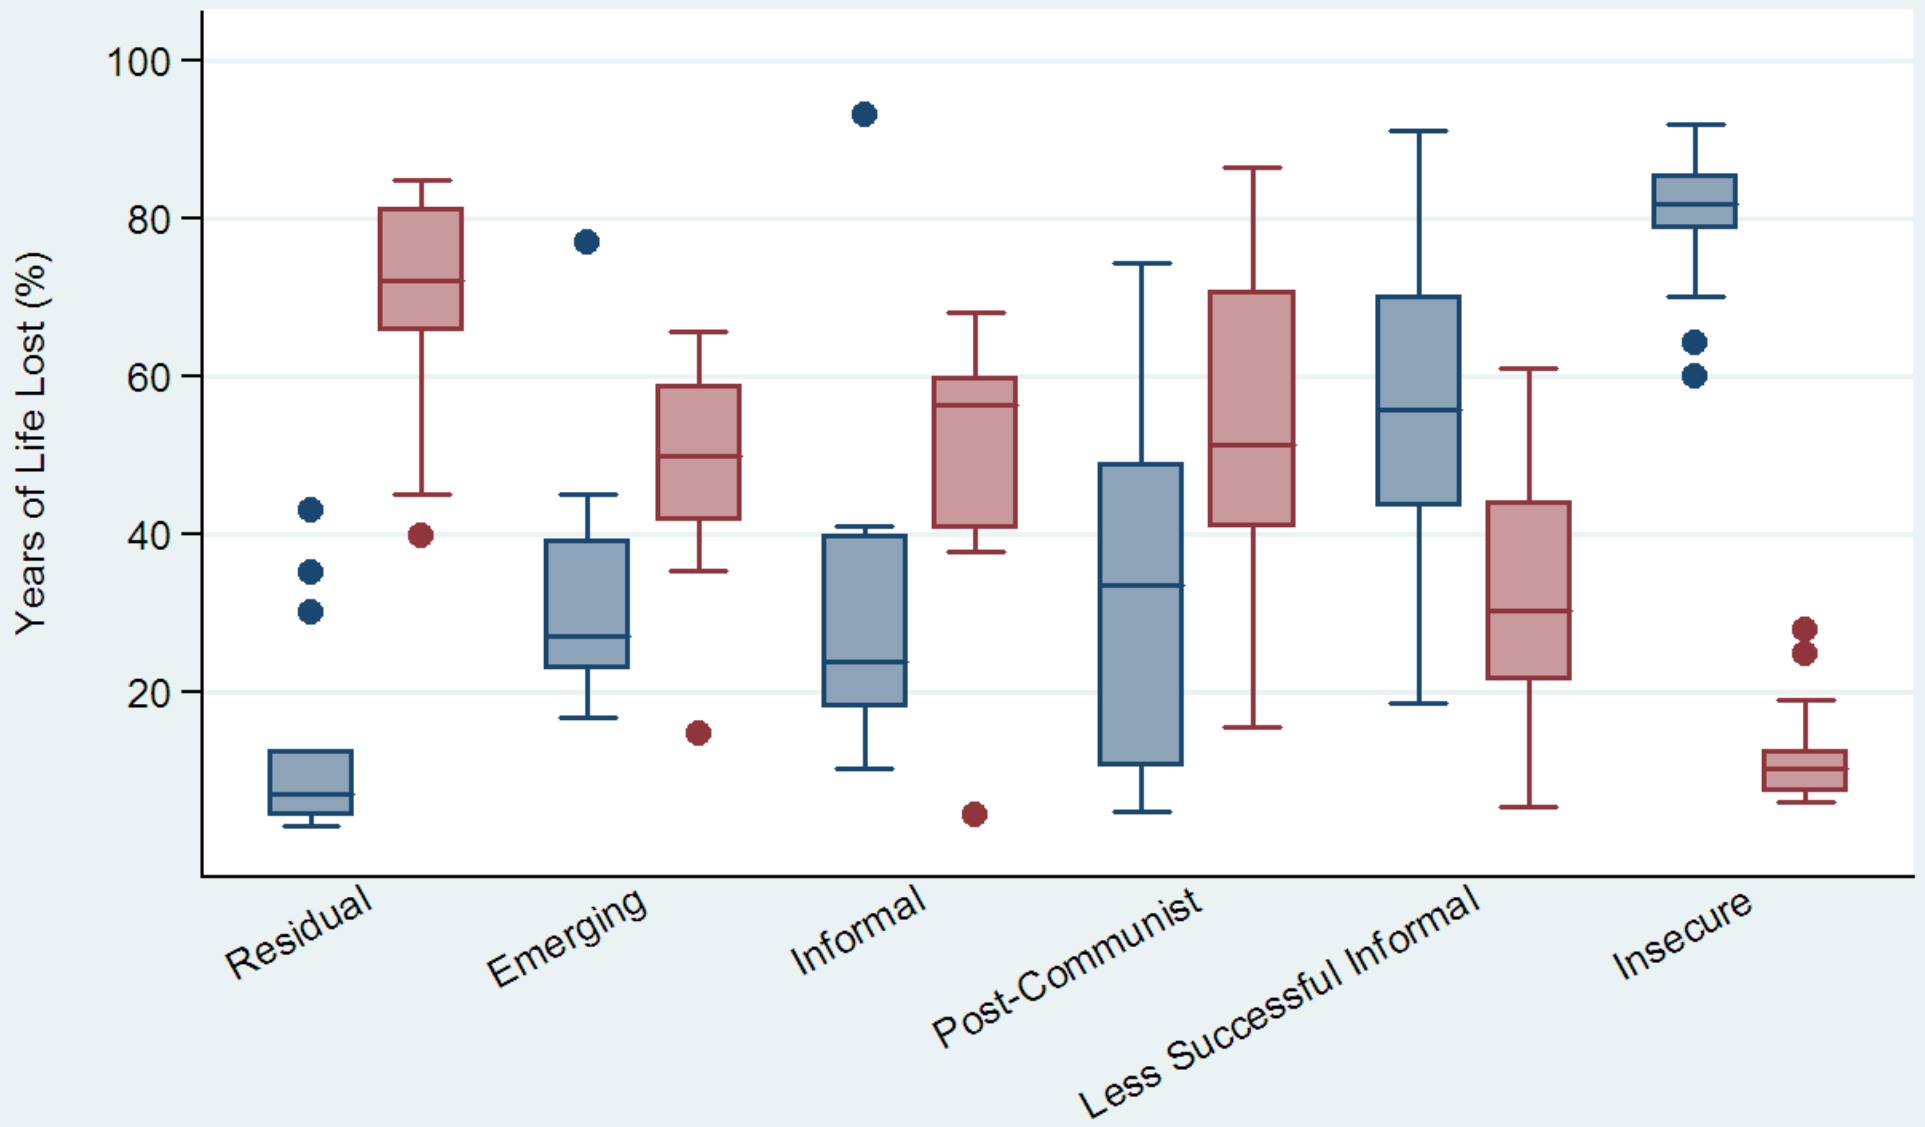

Years of life lost to communicable diseases (%), 2002  

 Years of life lost to non-communicable diseases (%), 2002

Supplement: MOESM4 [file 9491278]
